# Supplementary material for: Diagnosing Oxalate Nephropathy on Kidney Biopsy Specimens
Source: PubMed Central journal article supplement — Kidney Med. 2024 Nov 12;7(1):100930. doi: 10.1016/j.xkme.2024.100930 (PMC11681822; doi:10.1016/j.xkme.2024.100930), 2024-11-12
Supplement: mmc1.pdf [file mmc1.pdf]

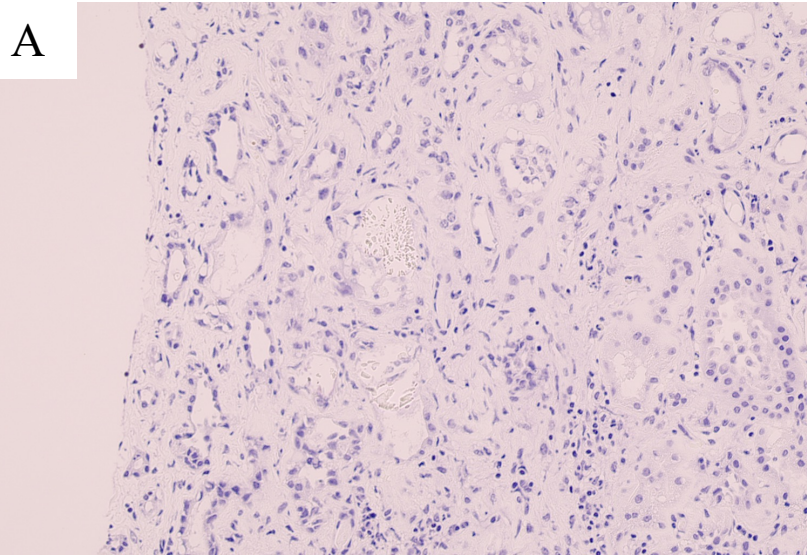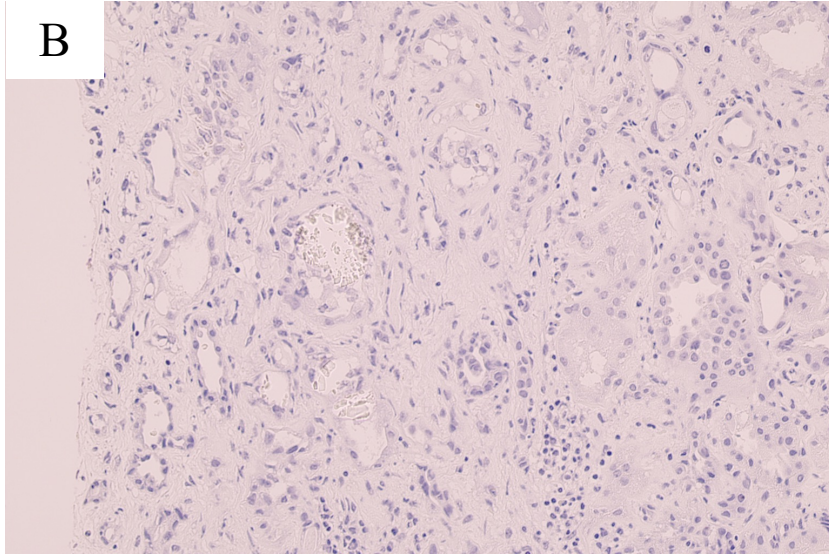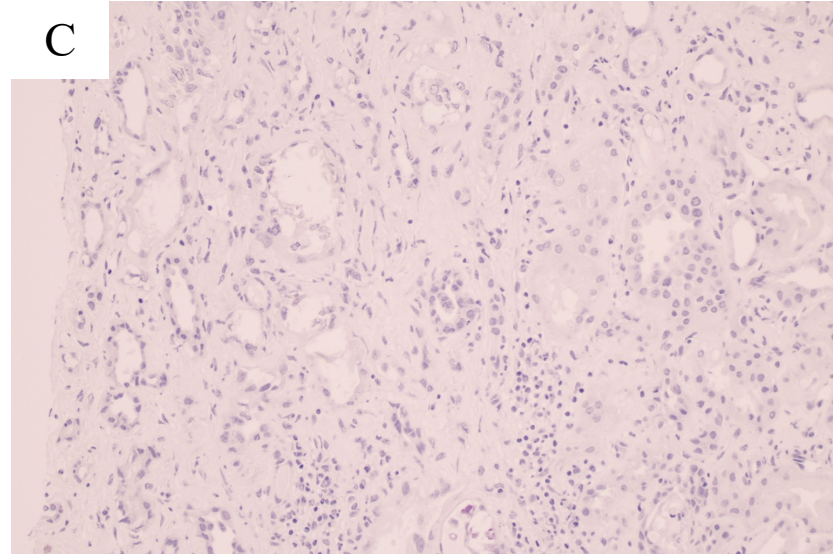

Figure S1.A. Carazzi Hematoxylin staining. B. Mayer's Hematoxylin staining. C. Mayer's Hematoxylin staining after periodic acid treatment.
